# Supplementary material for: Gaseous chemistry and aerosol mechanism developments for version 3.5.1 of the online regional model, WRF-Chem
Source: Copernicus journal article supplement (doi:10.5194/gmd-7-2557-2014), 2014-11-08
Supplement: Supplementary file 6 [file gmd-7-2557-2014-supplement.zip]

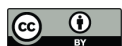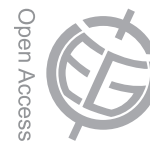

## *Supplement of*

# **Gaseous chemistry and aerosol mechanism developments for version 3.5.1 of the online regional model, WRF-Chem**

**S. Archer-Nicholls et al.**

*Correspondence to:* G. McFiggans (g.mcfiggans@manchester.ac.uk)

- Supplement-Cover-Letter.pdf
- \_\_MACOSX
  - ronoco\_development\_paper
    - \* .README.txt
    - \* AURN\_comparison
    - \* crimech\_scheme
    - \* movies
- ronoco\_development\_paper
  - AURN\_comparison
    - \* AURN\_measurement\_sites.pdf
    - \* README\_aurm.txt
    - \* compare\_no2\_8hrmean.pdf
    - \* compare\_no\_8hrmean.pdf
  - README.txt
  - crimech\_scheme
    - \* README\_crimech.txt
    - \* crimech.def
    - \* crimech.eqn
    - \* crimech.kpp
    - \* crimech.spc
    - \* crimech\_wrfkpp.equiv
  - movies
    - \* README\_movies.txt
    - \* no3\_timeseries.mp4
    - \* seasalt\_timeseries.mp4
