# Supplementary figures and images for: Gaseous chemistry and aerosol mechanism developments for version 3.5.1 of the online regional model, WRF-Chem
Source: Copernicus journal article supplement (doi:10.5194/gmd-7-2557-2014), 2014-11-08

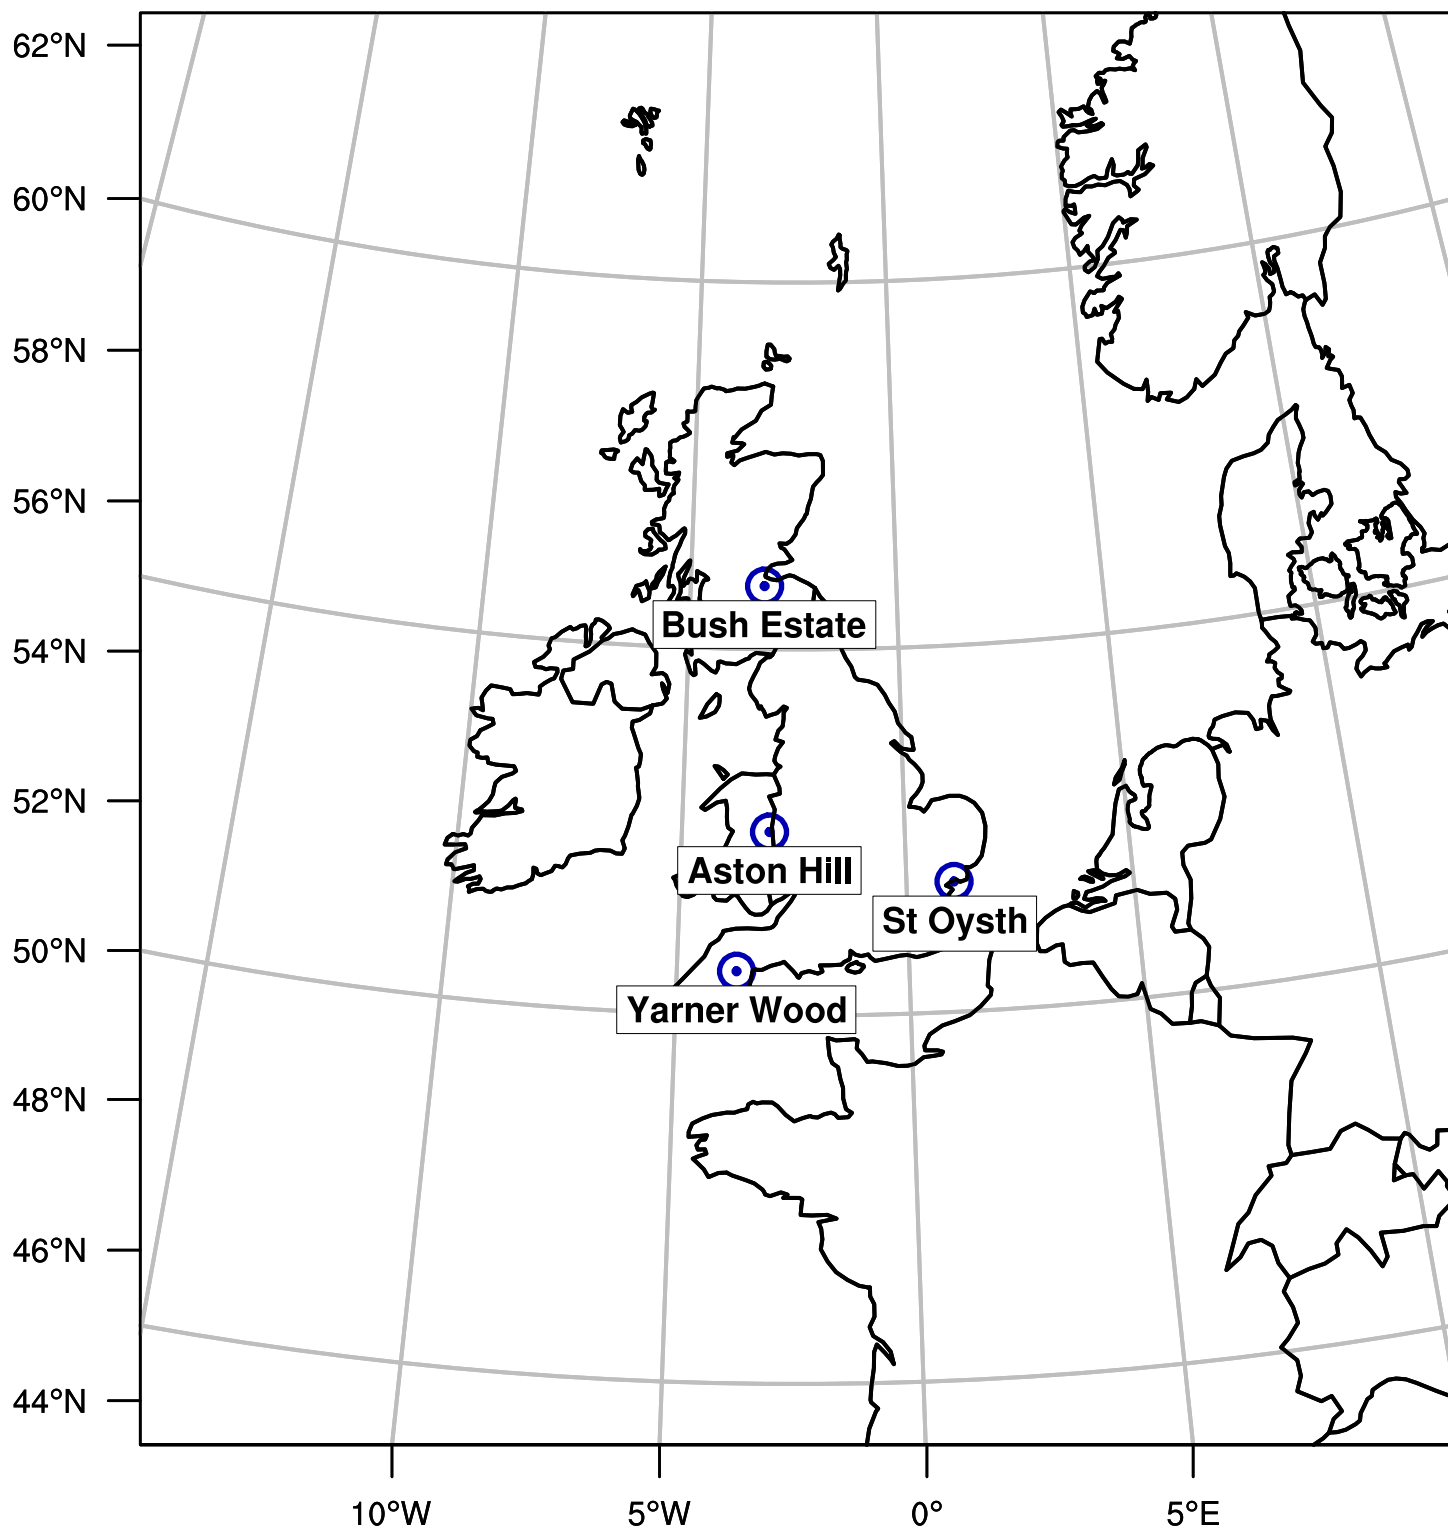

Supplement: Supplementary file 1 [file gmd-7-2557-2014-supplement.zip]

Yarner Wood

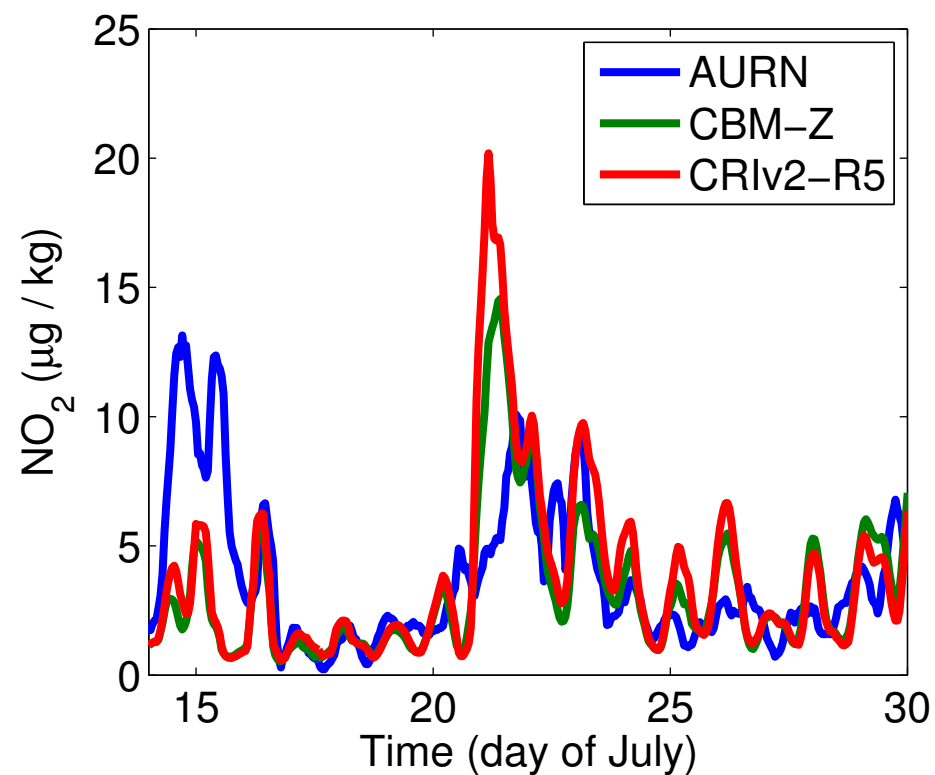

Bush Estate

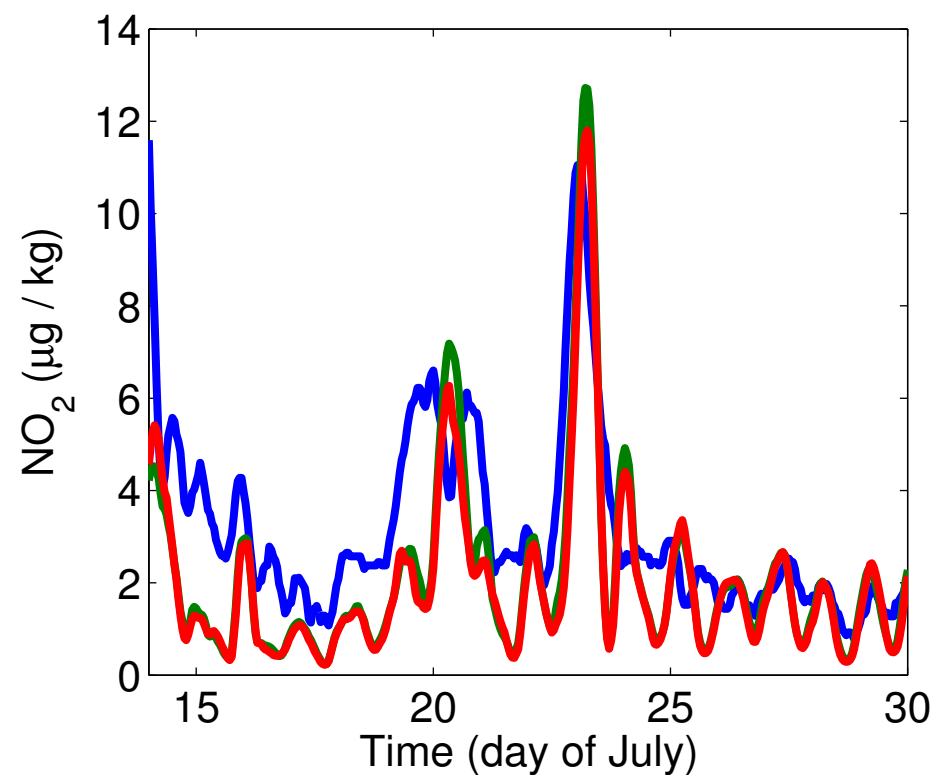

Aston Hill

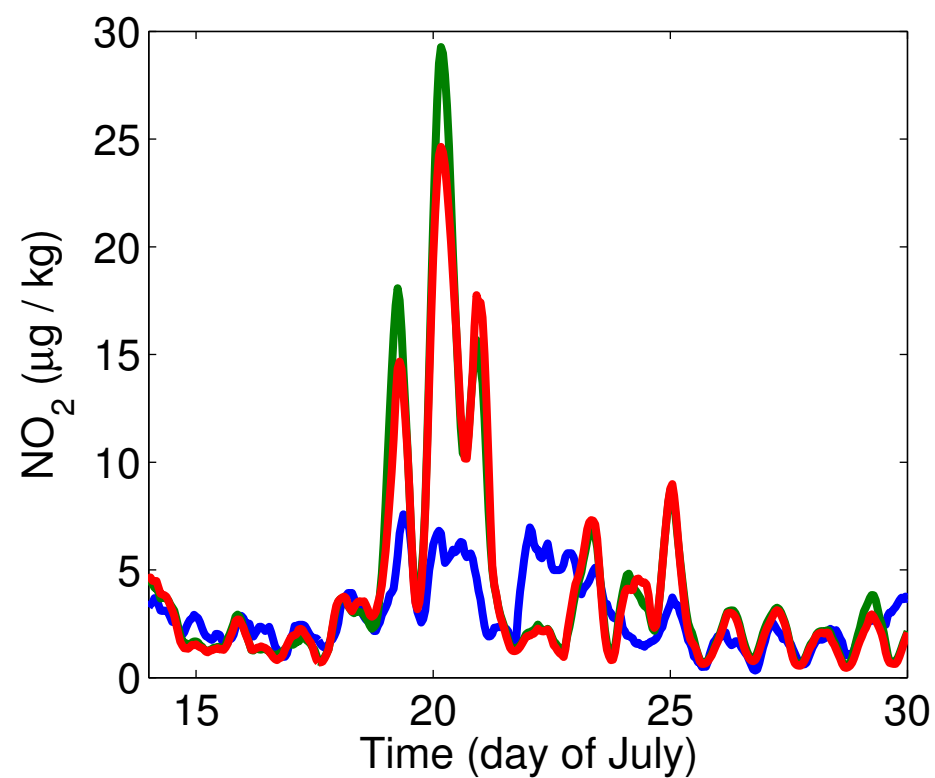

St Oysth

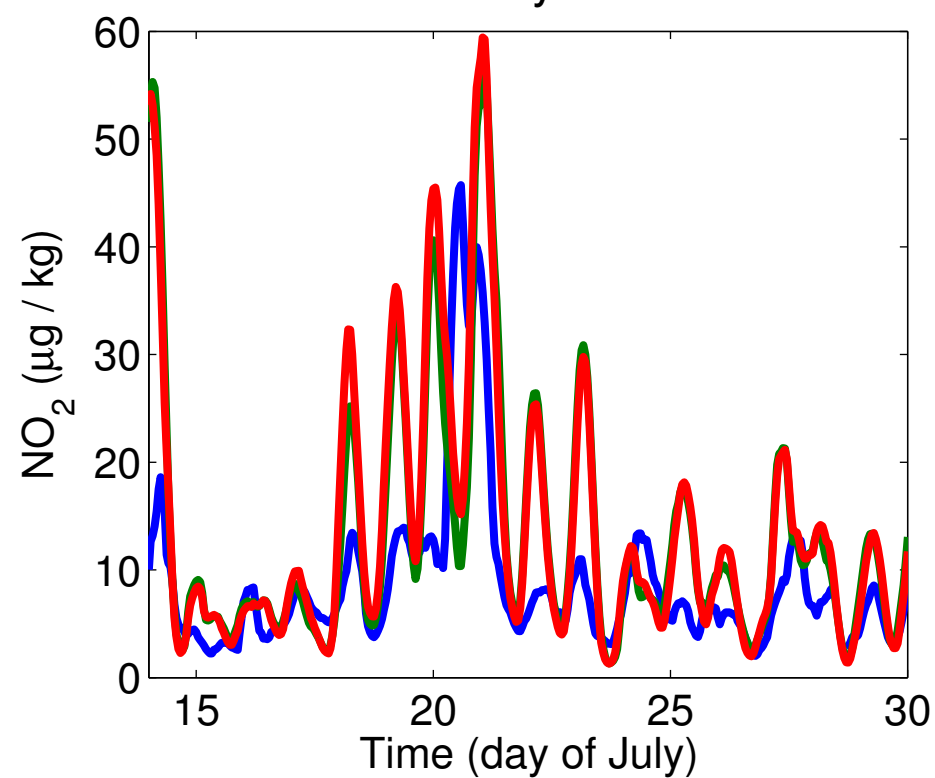

Supplement: Supplementary file 4 [file gmd-7-2557-2014-supplement.zip]

Yarner Wood

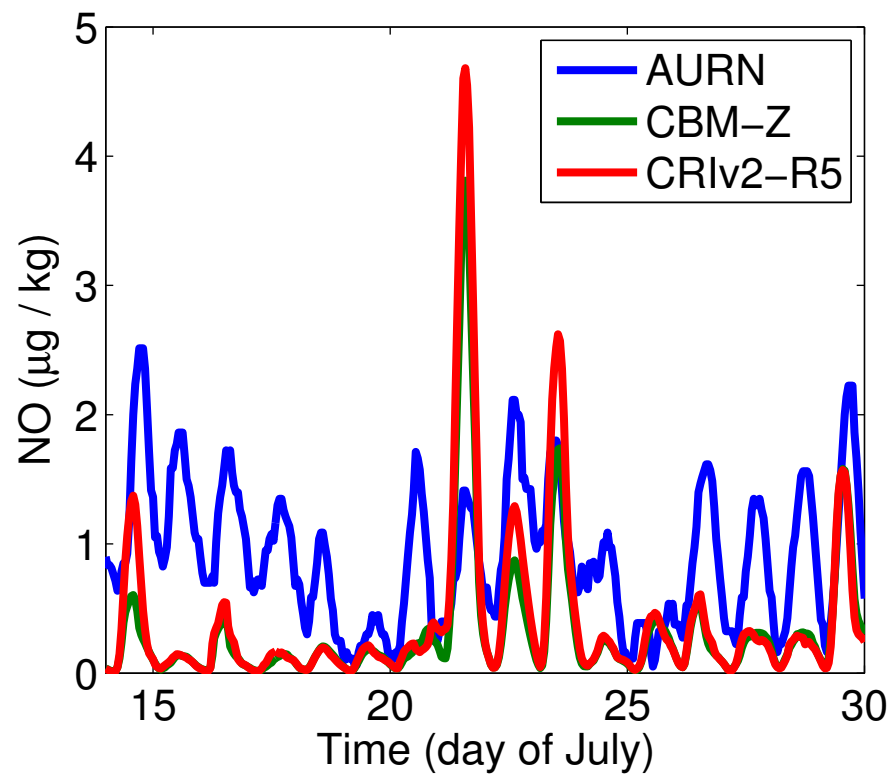

Bush Estate

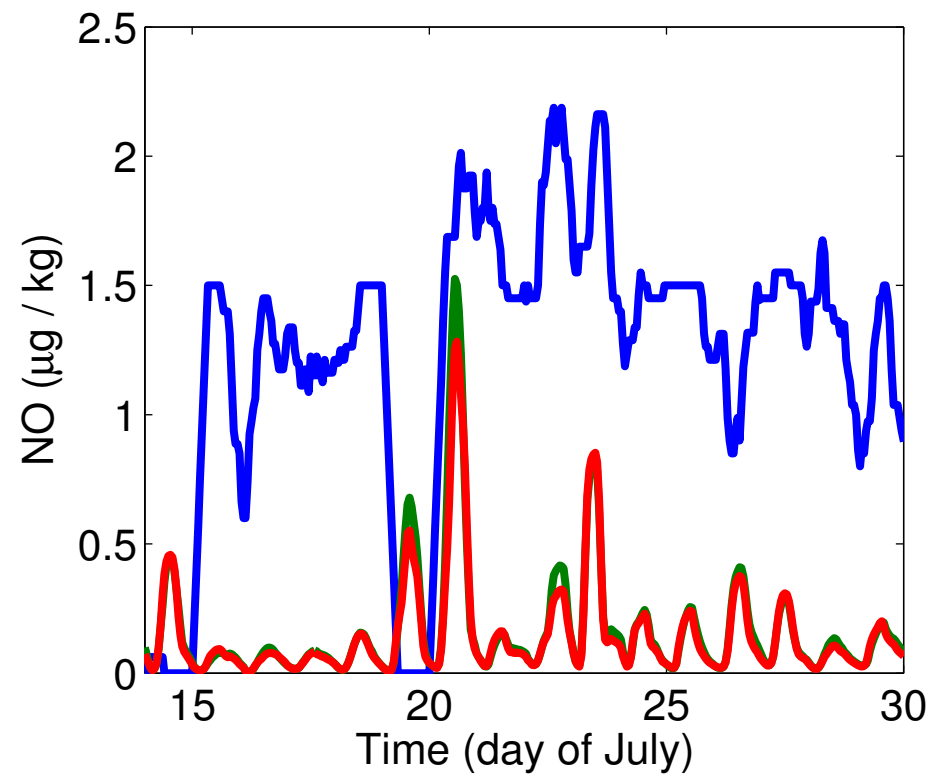

Aston Hill

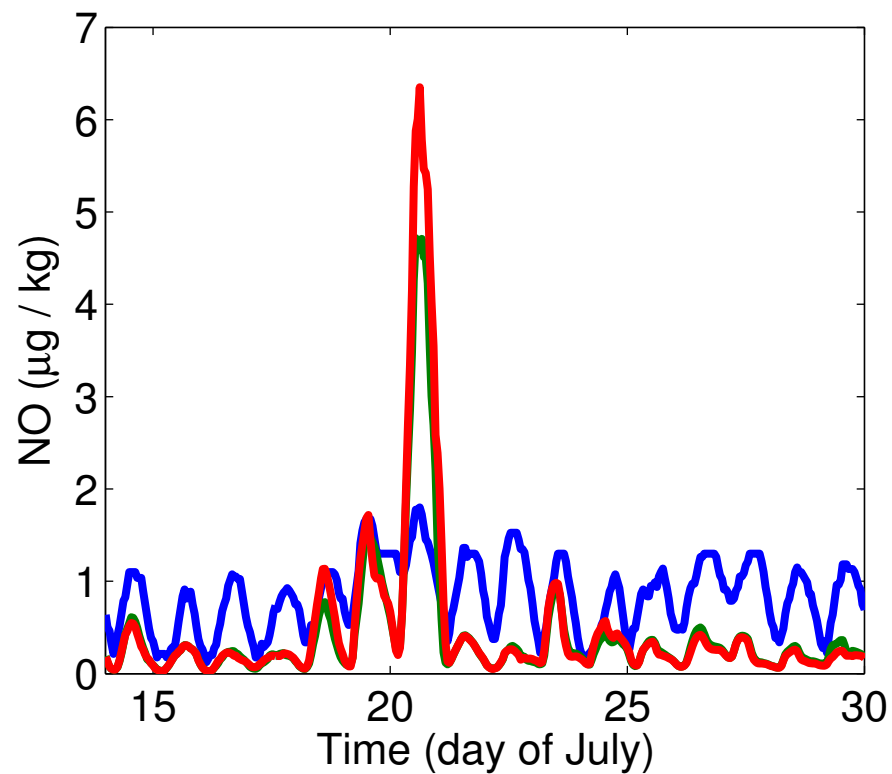

St Oysth

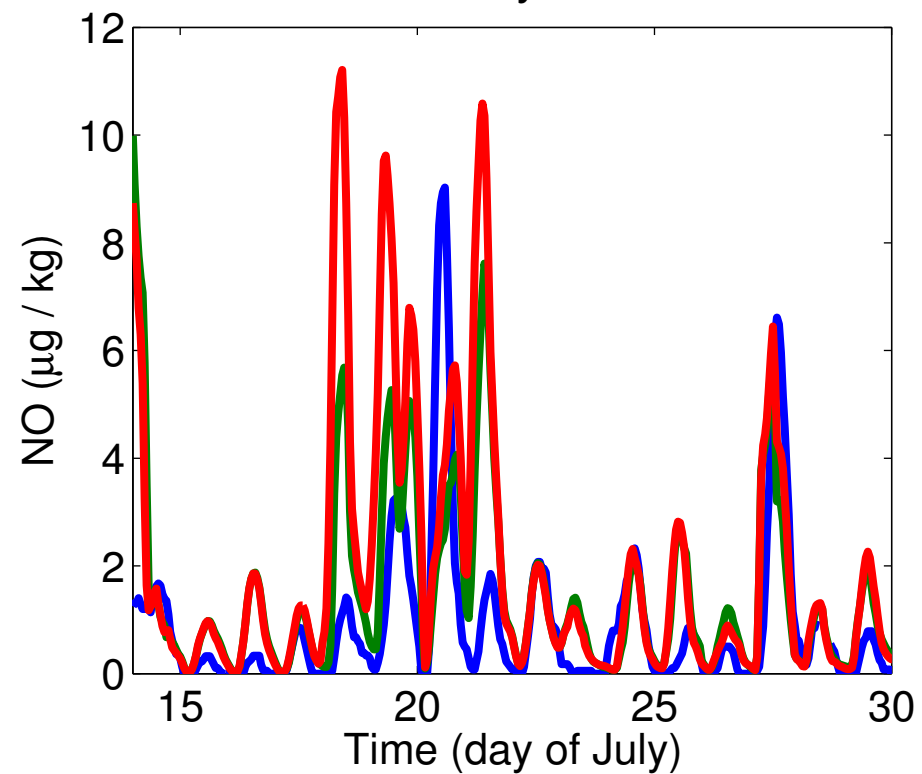

Supplement: Supplementary file 5 [file gmd-7-2557-2014-supplement.zip]
